# Supplementary material
Source: ML conference proceedings conference paper supplement (https://aclanthology.org/2026.semeval-1.414)
Supplement: SupplementaryMaterial [file ensemble-viz.pdf › fig/ensemble-viz.pdf]

Mean human rating    Area within 1 stdev    Model prediction

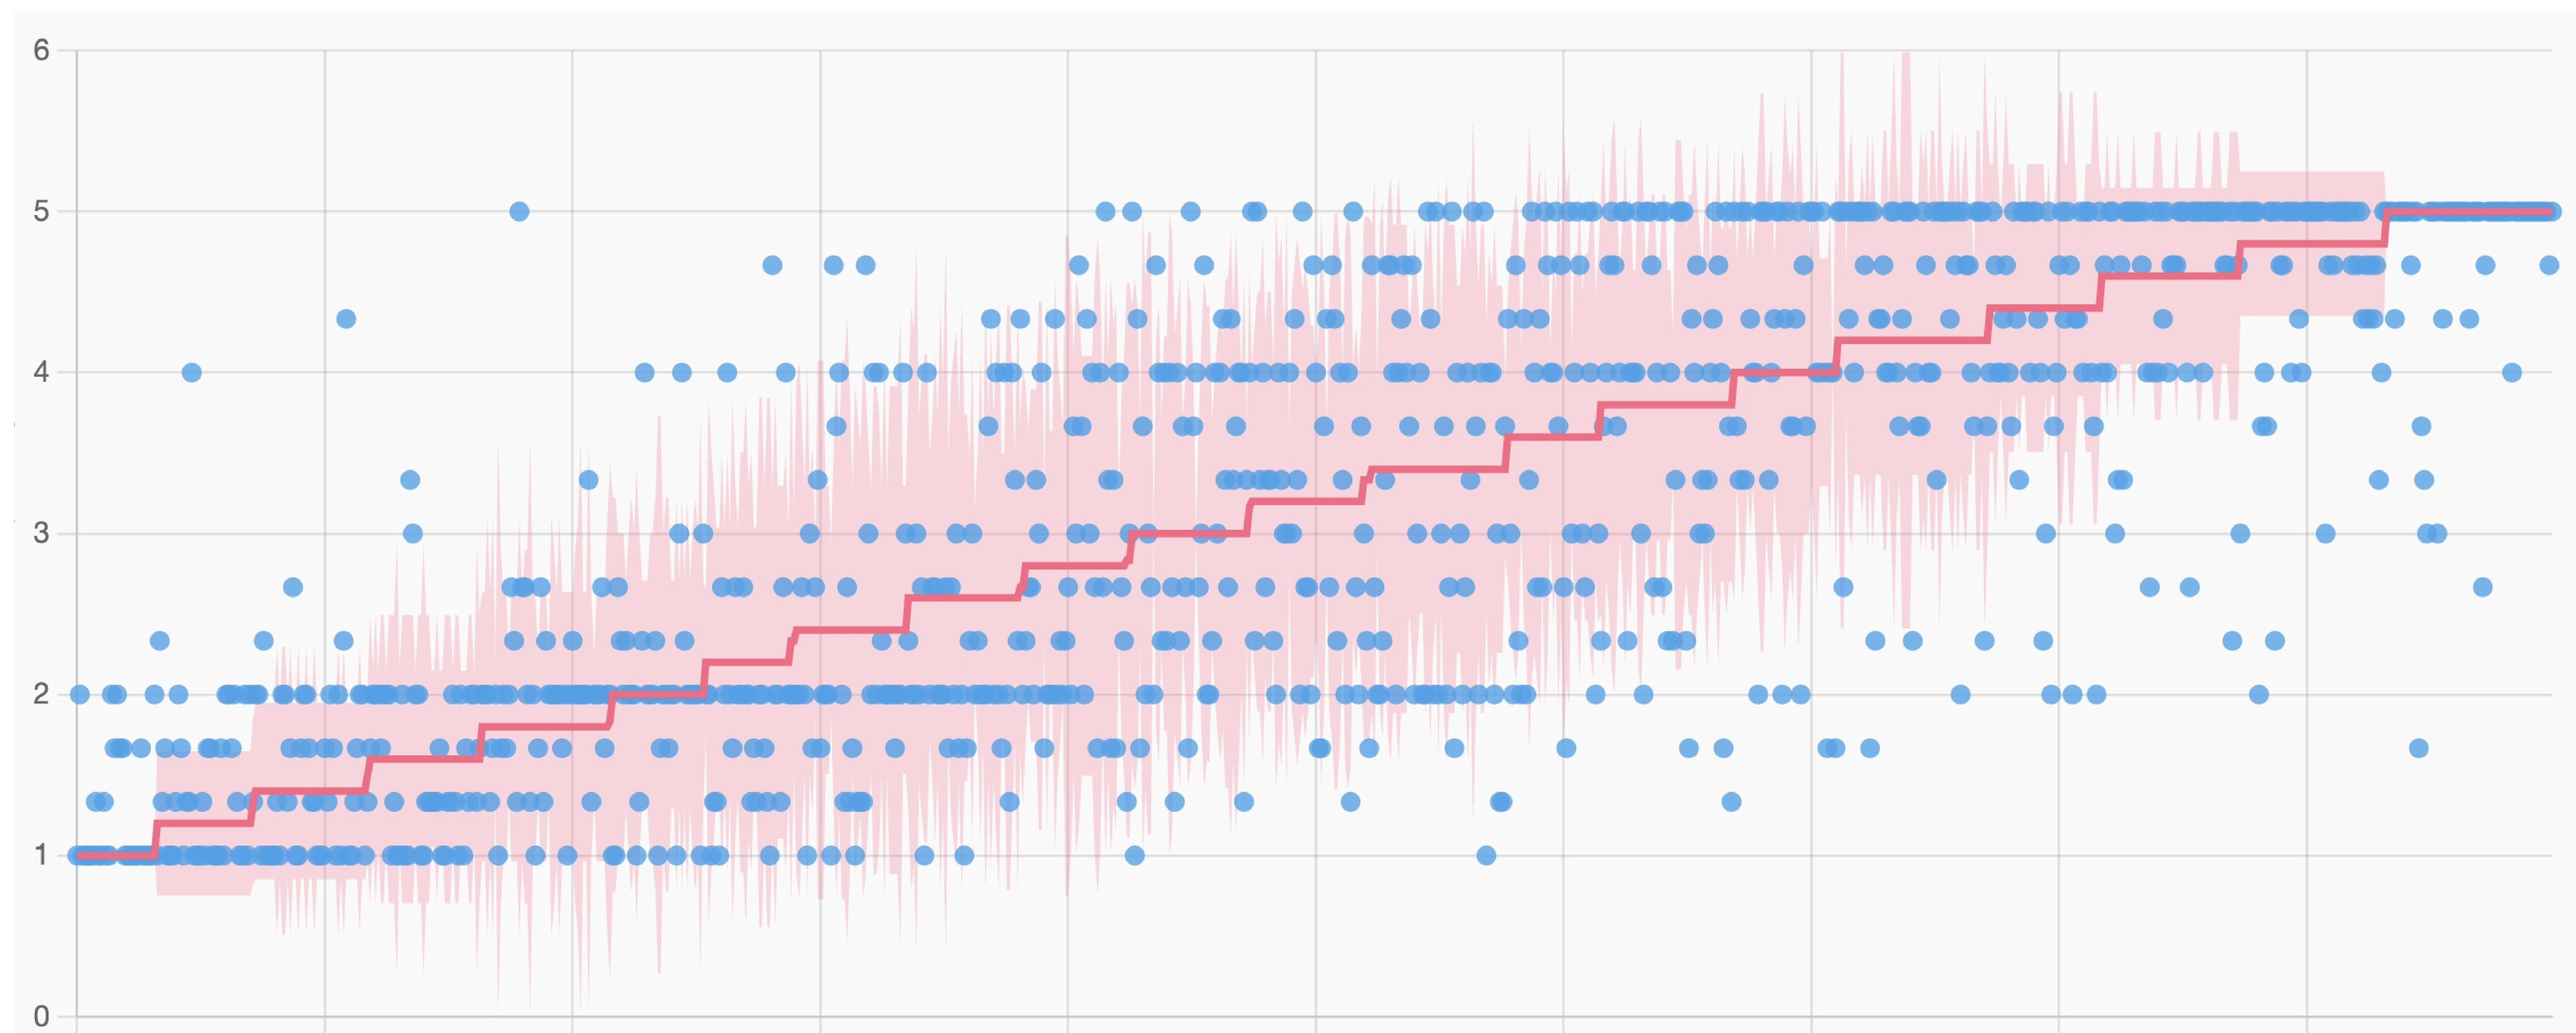

gpt-5-mini | Acc. 0.86 | Spearman ( $\rho$ ) 0.78 | Avg. 0.83 (Test)

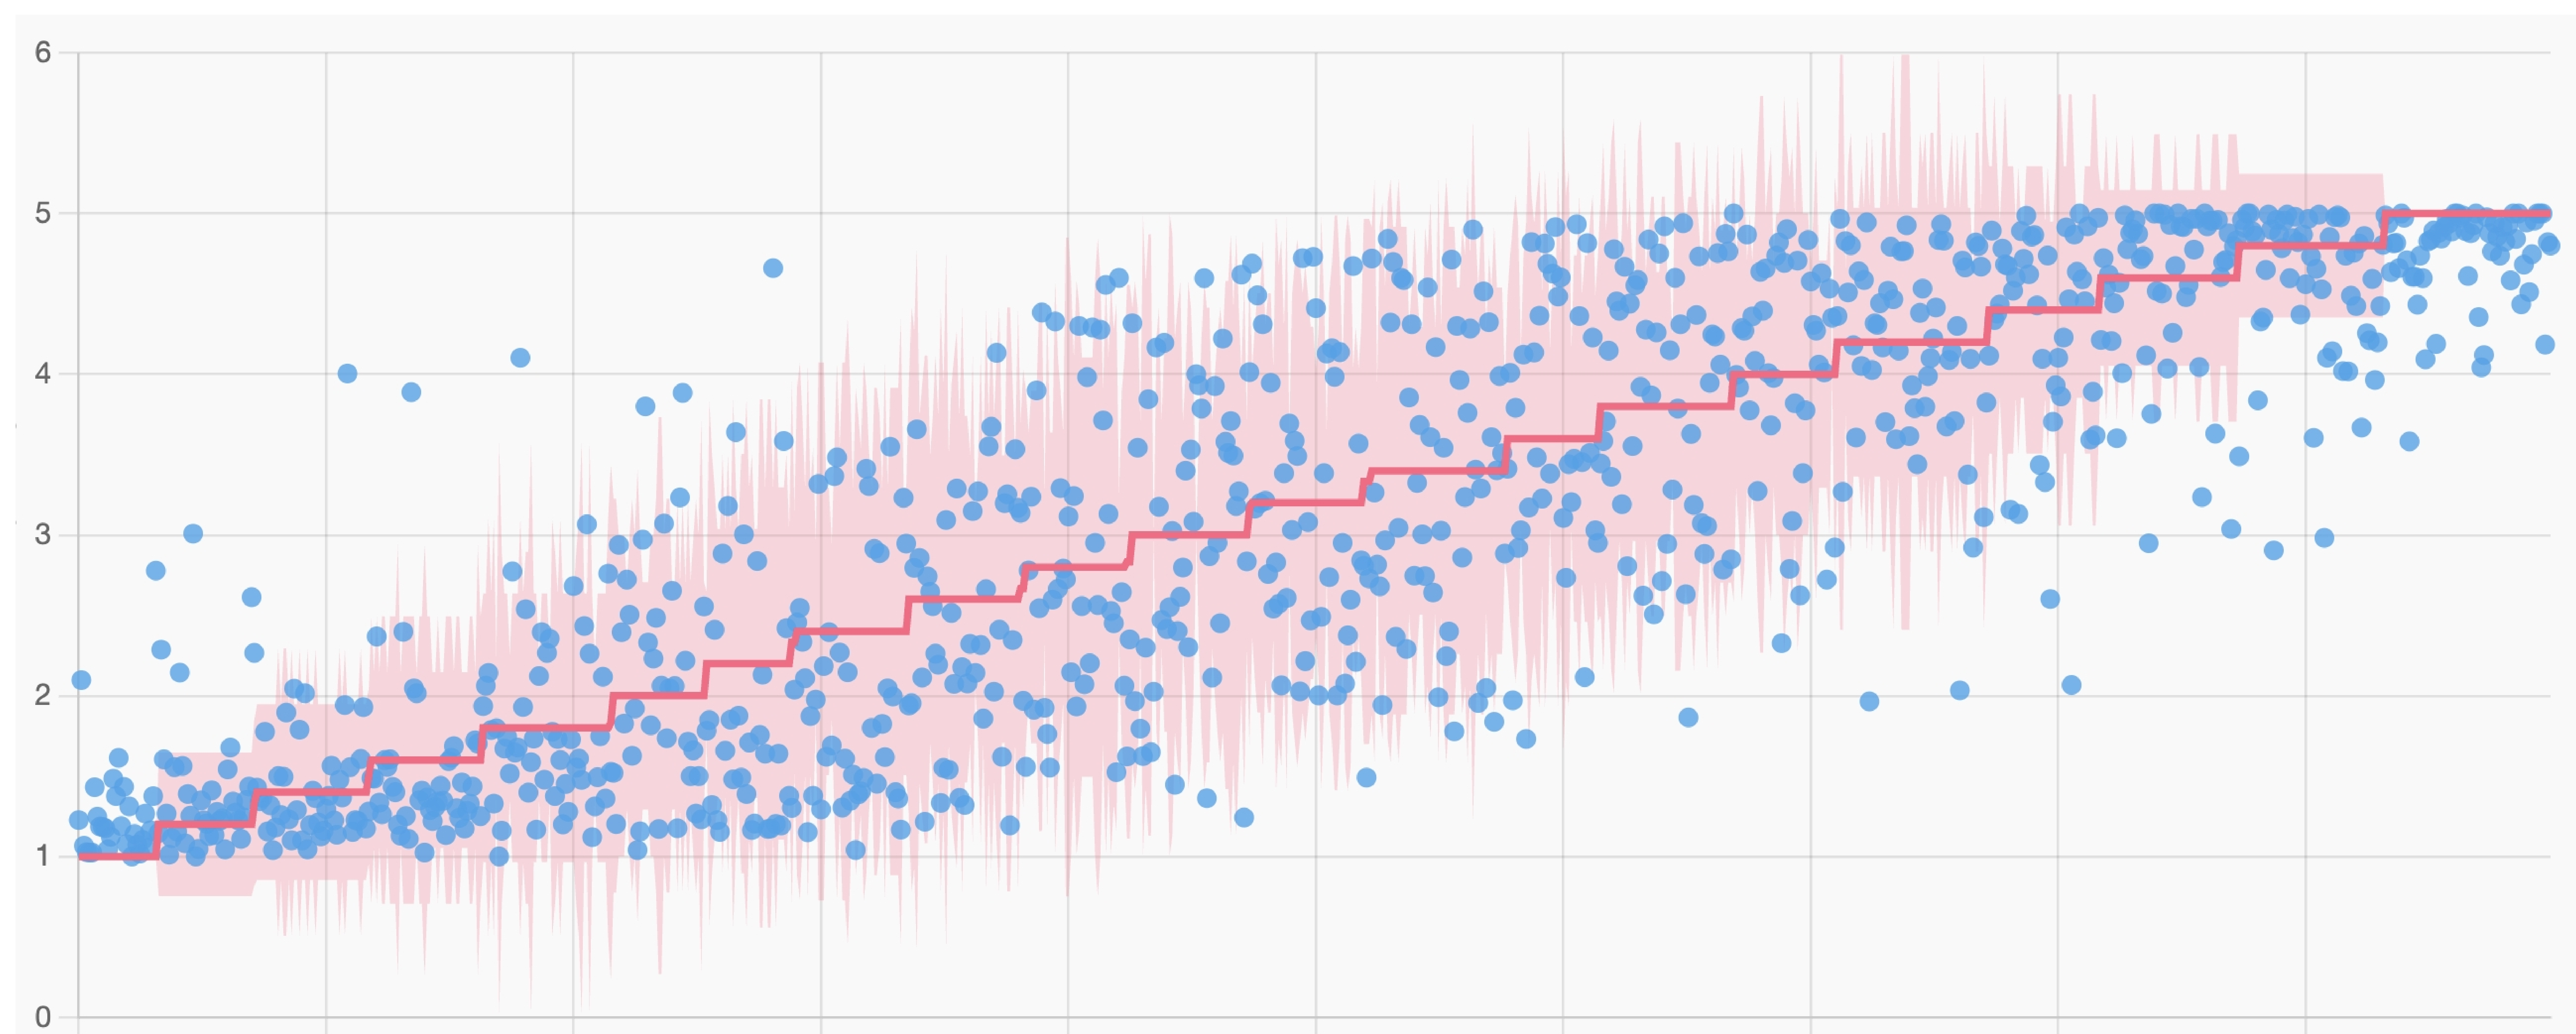

$E_{\text{All}}$  (10 LLMs) | Acc. 0.92 | Spearman ( $\rho$ ) 0.85 | Avg. 0.89 (Test)
