# Supplementary material
Source: ML conference proceedings conference paper supplement (https://aclanthology.org/2026.semeval-1.414)

# Range Distribution of Human Plausibility Scores

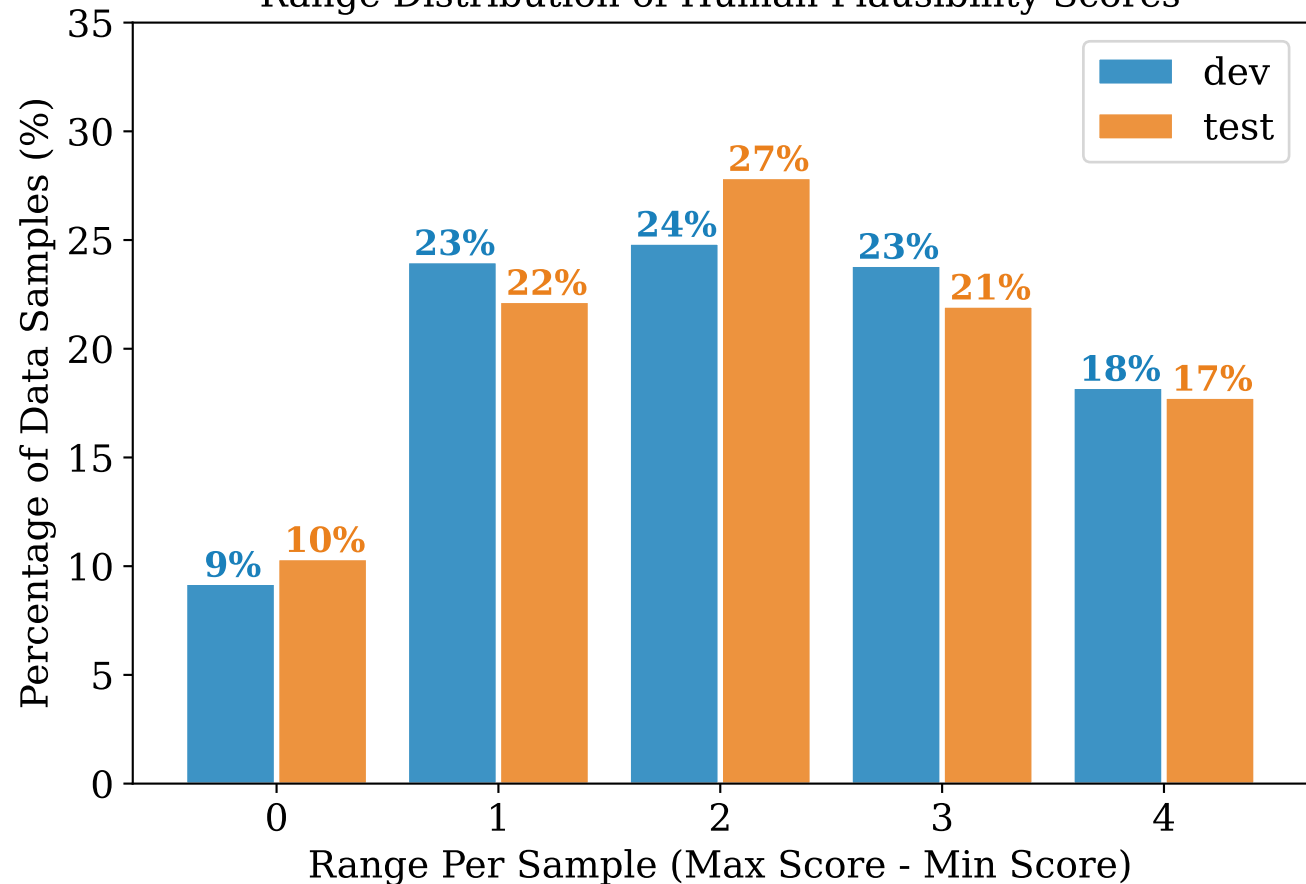

Supplement: SupplementaryMaterial [file fig_rangeDistribution.pdf › fig/fig_rangeDistribution.pdf]
